# Supplementary material for: Qualification of Standard Membrane-Feeding Assay with Plasmodium falciparum Malaria and Potential Improvements for Future Assays
Source: PubMed Central journal article supplement (PMC3590281; doi:10.1371/journal.pone.0057909), 2013-03-06
Supplement: pone.0057909.s003.pdf [file pone.0057909.s003.pdf]

$T_1=50\%$ 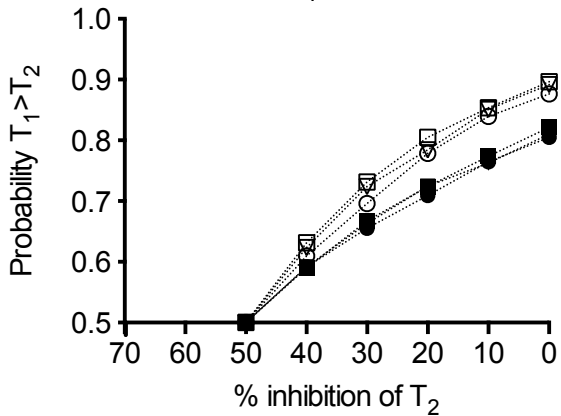 $T_1=70\%$ 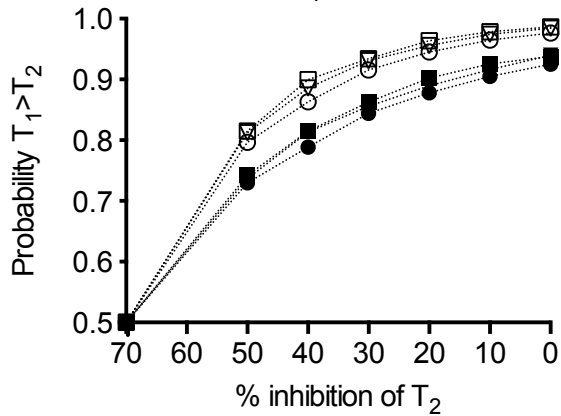

---○--- Co=4 SF

---▽--- Co=10 SF

---□--- Co=30 SF

---●--- Co=4 DF

---▼--- Co=10 DF

---■--- Co=30 DF
